# Supplementary material for: Conventional versus AI-based spectral data processing and classification approaches to enhance LIBS's analytical performance
Source: Royal Society of Chemistry journal article supplement (doi:10.1039/d5ay00027k), 2025-01-01
Supplement: d5ay00027k1.pdf [file d5ay00027k1.pdf]

## Supplementary material

Table S1 The percentages of the first two components obtained from the PLS-DA and their accumulative percentage.

| Discrimination<br>score plots | PLS-DA Components |                 |                                                         |
|-------------------------------|-------------------|-----------------|---------------------------------------------------------|
|                               | Component 1 (%)   | Component 2 (%) | Accumulative Percentage of<br>Component 1 + Component 2 |
| <b>3 (c)</b>                  | 29.3              | 32.5            | 61.8                                                    |
| <b>3 (d)</b>                  | 94.4              | 2.6             | 97                                                      |
| <b>4 (a)</b>                  | 92.8              | 2.3             | 95.1                                                    |
| <b>5 (a)</b>                  | 62.2              | 30.1            | 92.3                                                    |
| <b>6 (a)</b>                  | 79.8              | 14.4            | 94.2                                                    |
| <b>6 (b)</b>                  | 91.6              | 2.14            | 93.74                                                   |
